1 **Evidence-Based Complementary and Alternative Medicine**

2 **Analysis of the current state of acupuncture clinical trial**

3 **registration and reporting: for the past 9 years**

4 Quanai Zhang<sup>1¶</sup>, Huijuan Lv<sup>2¶</sup>, Yun Fu<sup>3</sup>, Benlu Chen<sup>3</sup>, Yingying Cai<sup>3</sup>, Qiwen Zhang<sup>1\*</sup>

5

6 <sup>1</sup> Department of Acupuncture and Moxibustion, The Third Affiliated Hospital of  
7 Zhejiang Chinese Medical University, Hangzhou, Zhejiang, China

8 <sup>2</sup> Department of Acupuncture and Rehabilitation, Wenling Hospital of Traditional  
9 Chinese Medicine , Wenling, Zhejiang, China

10 <sup>3</sup> The Third School of Clinical Medicine, Zhejiang Chinese Medical University,  
11 Hangzhou, Zhejiang, China

12

13 \* Corresponding author

14 E-mail: [626938768@qq.com](mailto:626938768@qq.com)

15

16 ¶¶These authors contributed equally to this work.

17

18 **Abstract**

19 *Background.* An increasing number of acupuncture clinical trials are registered, but  
20 the reports of results and data transparency are unclear. We aim to analyze and

21 evaluate the current state of registration and reports of acupuncture clinical trials.

22 *Methods.* This paper focused on the acupuncture clinical trials that met the criteria in

23 relevant studies registered and published during the period between 1 Jan 2013 to 31

24 Dec 2021. We traced by email to leaders that the report could not be searched. Besides,

25 questionnaire investigation was chosen to acupuncture clinicians around by WeChat.

26 *Results.* The overall reporting rate of acupuncture clinical trial results from the two

27 registration centers was 25%. Clinicaltrials.gov reporting rate was 12% and that from

28 ChiCTR was 41%. Only a small proportion of trials were available on the registry

29 website. Only the NIH clinical registry platform has records on the status of studies.

30 We only received 3 replies that indicated the project was due to be ended but not

31 completed. According to questionnaire, 157 clinicians have led clinical projects in

32 Acupuncture. It shows that 84% projects were ended but not completed or not

33 completed by the due date. About the reasons that caused the failure to find articles

34 after the end of the project, 85% participants thought projects were ended but not

35 completed or not completed by the due date. 15% participants thought projects were

36 manuscript rejected, manuscript accepted but not in print, results protected,

37 registration number unmarked, project delayed or negative results not submitted.

38 *Conclusion:* The number of acupuncture clinical trial registrations is steadily

39 increasing, but the reporting rate of trial results is relatively low and the transparency

40 of data is not ideal. Therefore, first of all, researchers should put more attention on

41 trials designed, trial reported and respect to science. Secondly, set up a research  
42 progress tracker on registration platforms accessible to the public users. At the same  
43 time, the journal is suggested that adjust the evaluation criteria for reporting the  
44 negative results. Researchers with negative results are encouraged to show. Most  
45 importantly, the funders are recommended to optimize the ended review.

## 46 **Introduction**

47 Clinical trial registration means that specific information about a trial needs to be  
48 prospectively registered in a web-based publicly accessible database [1]. Since the  
49 International Committee of Medical Journal Editors (ICMJE) announced in 2004 that  
50 clinical trials must be registered to be considered for publication [2], there has been an  
51 increasing emphasis on the regulation of acupuncture clinical trial registration to  
52 reduce the duplication of research [3] and to help prevent bias in reporting of results  
53 [4,5,6]. The Final Rule [7,8], which came into effect on 18 January 2017, provides  
54 further clarity on clinical trial registration and reporting requirements. The timely  
55 publication of trial data will facilitate academic communication, provide guidance on  
56 clinical practice and promote the development of evidence-based medicine [9].

57 After searching and collecting registered clinical trial literature, it is noticed that some  
58 of the clinical trial literature is marked with registration numbers, and some registered  
59 trials have not been published or data is unavailable. A study has evaluated the  
60 registration and reporting of clinical trials from the start of the registry to 2013 and the

61 results were not optimistic [10]. To further explore the current state of the number of  
62 registered clinical trials on acupuncture and their reporting in recent years, this study  
63 intends to dig deeper into the clinical trials related to acupuncture registered from  
64 2013 to 2021, in order to discover the problems and seek possible solutions to  
65 improve the quality of clinical research.

## 66 **Methods**

### 67 **Search strategies**

68 Terms, such as "needle" and "acupuncture" , are searched in Chinese Clinical Trial  
69 Registry platform[11]. We select "Advanced Search" with the search term  
70 "acupuncture" in Clinicaltrials.gov[12]. The search period was set from January 1,  
71 2013 to December 31, 2021.

72 The publications were searched on the Web of Science, PubMed, CNKI, WanFang,  
73 VIP, and China Biomedical Literature Database, in English and Chinese only.

74 For some trials that the report could not be searched, we traced by email to leaders,  
75 the main issues investigated was the progress of trails.

76 Email response rate too low, so questionnaire investigation was chosen to acupuncture  
77 clinicians around by WeChat. The content of the survey was following: Question 1.  
78 Have you ever held a clinical project in Acupuncture? Question 2. Would your project  
79 be completed on time and would the results related to the research objectives be  
80 published before the end of the project? Question 3. What do you think caused the

81 failure to find articles related to the research objectives in public available databases  
82 after the end of the project? ( If the answer to question 1 is no, the rest of the questions  
83 cannot be seen).

84 **Inclusion criteria** All clinical trials related to acupuncture (including  
85 electroacupuncture) registered between 1 January 2013 and 31 December 2021.

86 **Exclusion criteria** Duplicate registered clinical trials.

87 **Statistical analysis** After training three researchers responsible for the literature  
88 search (Benlu Chen, Yun Fu and Yingying Cai), data from the registered trials were  
89 extracted and summarized through EXCEL. And articles with published trial results  
90 were considered as results publication. The report was based on the above databases  
91 for subject terms, publication date, author, author institution, registration number,  
92 subject number, etc. If the publication is in the type of protocol or review, it is  
93 considered as other publication. The results of email responses and questionnaires are  
94 also summarized in Excel. For the extraction and searching process, if there is  
95 disagreement among three researchers, firstly, three parties should negotiate to solve  
96 the problem. If the agreement is not reached after the negotiation, then we need to  
97 seek help from experienced people or relevant experts.

## 98 **Results**

99 The results of the search are shown in Fig 1. We found 2335 registered trials in  
100 ChiCTR and Clinicaltrials.gov. After selection, we finally selected 922 trials for our

101 study. Of the included trials, ChiCTR had 166 trials whose results have now been  
102 published, and Clinicaltrials.gov with 62 trails. The results of the two centers are  
103 listed separately as there are differences in reporting and implementation of results  
104 and focuses on different issues. The state of trial registration and reporting is shown in  
105 Table 1.

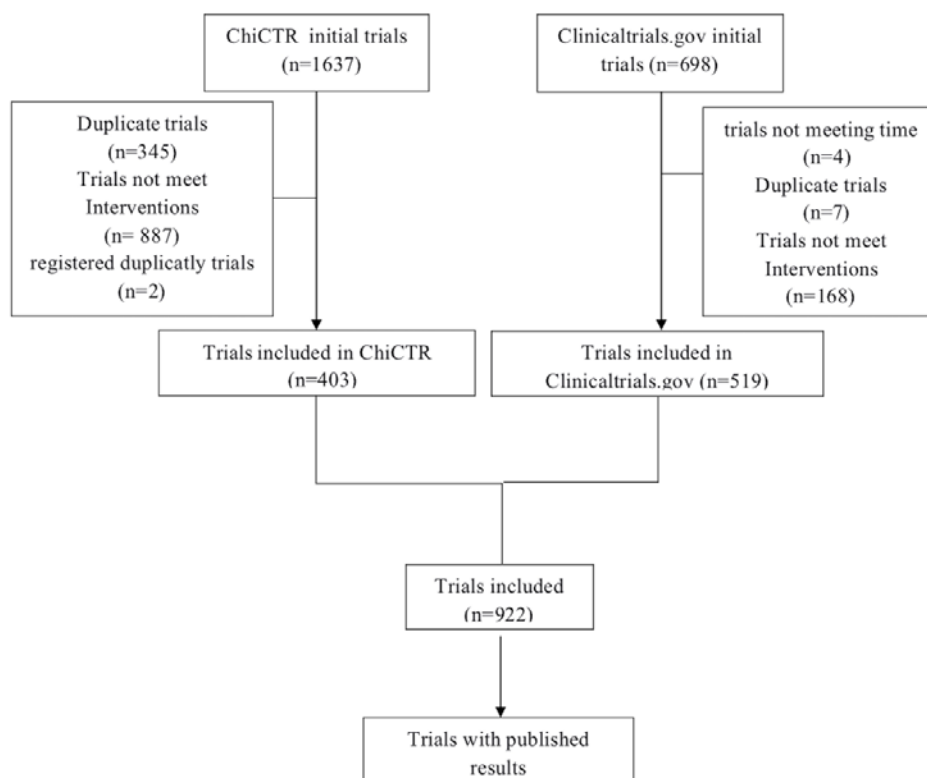

106

107

Fig 1. Flow chart of search

Table 1 Trial registration and reporting state

| NC(items) |     | PA(items) |    |    | ND(items) |    |    | Status of trial with no published results and transparent data |                           |                    |            |         |            |           |                         |           |
|-----------|-----|-----------|----|----|-----------|----|----|----------------------------------------------------------------|---------------------------|--------------------|------------|---------|------------|-----------|-------------------------|-----------|
| E         | T   | C         | E  | T  | C         | E  | T  | Active, not recruited                                          | Completed, not recruiting | Not yet recruiting | Recruiting | Unknown | Terminated | Withdrawn | Enrolling by invitation | Suspended |
| 4         | 15  | 3         | 1  | 4  | 0         | 0  | 0  | 0                                                              | 4                         | 0                  | 0          | 6       | 1          | 0         | 0                       | 0         |
| 13        | 23  | 3         | 0  | 3  | 0         | 2  | 2  | 3                                                              | 14                        | 0                  | 1          | 10      | 2          | 3         | 0                       | 0         |
| 11        | 33  | 2         | 1  | 3  | 0         | 1  | 1  | 1                                                              | 17                        | 0                  | 0          | 16      | 1          | 2         | 0                       | 0         |
| 6         | 22  | 9         | 0  | 9  | 0         | 4  | 4  | 1                                                              | 11                        | 0                  | 7          | 14      | 2          | 0         | 0                       | 0         |
| 7         | 37  | 4         | 1  | 5  | 0         | 3  | 3  | 0                                                              | 10                        | 0                  | 7          | 17      | 2          | 0         | 0                       | 0         |
| 7         | 32  | 2         | 3  | 5  | 0         | 1  | 1  | 2                                                              | 18                        | 1                  | 7          | 7       | 1          | 0         | 0                       | 0         |
| 4         | 24  | 4         | 2  | 6  | 0         | 15 | 15 | 3                                                              | 10                        | 8                  | 34         | 4       | 2          | 1         | 3                       | 1         |
| 0         | 3   | 1         | 1  | 2  | 0         | 24 | 24 | 1                                                              | 7                         | 11                 | 20         | 0       | 0          | 0         | 3                       | 1         |
| 0         | 0   | 0         | 1  | 1  | 0         | 45 | 45 | 1                                                              | 11                        | 16                 | 32         | 0       | 1          | 1         | 0                       | 0         |
| 52        | 189 | 28        | 10 | 38 | 0         | 95 | 95 | 12                                                             | 102                       | 36                 | 108        | 74      | 12         | 7         | 6                       | 2         |
| 84        | 83  | 8         | 16 | 17 | 0         | 18 | 18 | 2                                                              | 20                        | 7                  | 21         | 14      | 2          | 1         | 1                       | 0.39      |

| NP(items) |    |     | MRN (items) |    |     | OP(items) |    |    | NA  |     |     | DD(items) |    |    | PNDA |    |     |     |
|-----------|----|-----|-------------|----|-----|-----------|----|----|-----|-----|-----|-----------|----|----|------|----|-----|-----|
| C         | E  | T   | C           | E  | T   | C         | E  | T  | C   | E   | T   | C         | E  | T  | C    | E  | T   |     |
| 14        | 5  | 19  | 6           | 5  | 11  | 3         | 8  | 11 | 25  | 20  | 45  | 0         | 6  | 6  | 14   | 4  | 18  | 11  |
| 13        | 13 | 26  | 3           | 13 | 16  | 1         | 8  | 9  | 18  | 24  | 42  | 0         | 7  | 7  | 13   | 12 | 25  | 10  |
| 24        | 12 | 36  | 17          | 12 | 29  | 3         | 11 | 14 | 49  | 25  | 74  | 3         | 10 | 13 | 21   | 9  | 30  | 22  |
| 25        | 6  | 31  | 7           | 6  | 13  | 3         | 13 | 16 | 38  | 22  | 60  | 3         | 7  | 10 | 22   | 5  | 27  | 16  |
| 34        | 8  | 42  | 20          | 8  | 28  | 2         | 11 | 13 | 54  | 29  | 83  | 1         | 0  | 1  | 33   | 8  | 41  | 30  |
| 27        | 10 | 37  | 18          | 10 | 28  | 11        | 7  | 18 | 51  | 18  | 69  | 2         | 5  | 7  | 25   | 9  | 34  | 25  |
| 24        | 6  | 30  | 12          | 6  | 18  | 5         | 4  | 9  | 37  | 11  | 48  | 4         | 4  | 8  | 20   | 5  | 25  | 20  |
| 4         | 1  | 5   | 1           | 1  | 2   | 0         | 6  | 6  | 6   | 7   | 13  | 2         | 1  | 3  | 2    | 1  | 3   | 3   |
| 1         | 1  | 2   | 0           | 1  | 1   | 1         | 1  | 2  | 1   | 4   | 5   | 0         | 1  | 1  | 1    | 1  | 2   | 0   |
| 166       | 62 | 228 | 84          | 62 | 146 | 29        | 69 | 98 | 279 | 160 | 439 | 15        | 41 | 56 | 151  | 54 | 205 | 137 |
| 41        | 12 | 25  | 21          | 12 | 16  | 7         | 13 | 11 | /   | /   | /   | 4         | 8  | 6  | 91   | 87 | 90  | 83  |



| Year  | NR(items) |     |     |
|-------|-----------|-----|-----|
|       | C         | E   | T   |
| 2013  | 22        | 29  | 51  |
| 2014  | 24        | 59  | 83  |
| 2015  | 42        | 67  | 109 |
| 2016  | 41        | 58  | 99  |
| 2017  | 70        | 55  | 125 |
| 2018  | 77        | 57  | 134 |
| 2019  | 68        | 79  | 147 |
| 2020  | 31        | 51  | 82  |
| 2021  | 28        | 64  | 92  |
| T     | 403       | 519 | 922 |
| P (%) | 44        | 56  | /   |

109 Provided are abbreviations: Number of Registrations(NR), ChiCTR (C),  
 110 Clinicaltrials.gov(E), Total(T), Number of Publications(NP), Mark the Registration  
 111 Number(MRN), Other Publications(OP), Number of Articles(NA), Data  
 112 Downloadable(DD), Published No Data Available(PNDA), Normal Completion(NC),  
 113 Published in Advance(PA), Not yet Due(ND), Percentage(P).

114 **1. Number of acupuncture clinical trial registrations**

115 2014 witnessed the most significant increase in registrations of Clinicaltrials.gov.  
 116 2017 witnessed the most significant increase in registrations of ChiCTR and 2020  
 117 witnessed the felling.

118 **2. Results publication rate**

119 The total results reporting rate for acupuncture clinical trial articles in both registries  
 120 was 25%. Specifically, Clinicaltrials.gov reporting rate was 12% for results, same as  
 121 those reports with registration numbers marked. Other types of publication accounted  
 122 for 13%. ChiCTR reporting rate was 41% for results, with 21% for reporting with  
 123 registration numbers clearly marked, and 7% for other types of publication.

124 **3. Publication timeline**

125 The majority of trials with published results were published after completion of the  
126 trial, accounting for 83%. Specifically, Clinicaltrials.gov accounted for 84% of the  
127 trials registered; ChiCTR accounted for 83%.

128 Only 17% of the trials were published early. Of the unpublished trials, only 18% are  
129 in progress before the due date, while the rest were unpublished on due date.

130 **4. Results data availability**

131 Only a small proportion of trials were available on the registry website. A total of 6%  
132 trials were available from both registries. Specifically, 8% Clinicaltrials.gov trials  
133 were available; and 4% ChiCTR trials were available. 90% published trials' data was  
134 not publicly available. Specifically, 87% published trials' data of Clinicaltrials.gov  
135 was not publicly available and ChiCTR was available for 91%.

136 **5. Study status of unpublished trials**

137 Only the NIH clinical registry platform has records on the status of studies, of which  
138 the largest number were recruiting, completed and unknown details at 108, 102 and 74  
139 respectively. A small number of trials were discontinued and suspended details at 12  
140 and 2, respectively.

141 **6. Survey results**

142 We sent 694 emails but only received 3 replies. All email responses indicated that the  
143 project was due to be ended but not completed.

144 There were 218 acupuncture clinicians who took part in the questionnaire. 157  
145 clinicians have led clinical projects in Acupuncture. But of them, only 12% projects  
146 were completed. 51% projects were ended but not completed. 33% projects were not  
147 completed by the due date. 4% projects were in progress. About the reasons that  
148 caused the failure to find articles related to the research objectives in public available  
149 databases after the end of the project, 52% participants thought projects were ended  
150 but not completed. 33% participants thought projects were not completed by the due  
151 date. 3% participants thought manuscript was rejected. 2% participants thought  
152 manuscript was accepted but not in print. 3% participants thought results need to be  
153 protected. 2% participants thought registration number was not marked. 3%  
154 participants thought project was delayed. 2% participants thought negative results  
155 were not submitted.

## 156 **Discussion**

### 157 **1.Registration trends**

158 The number of acupuncture clinical trial registrations in both registries has steadily  
159 increased year by year. At the beginning of 2017, the fact that the number of ChiCTR  
160 registrations are significantly higher than the previous number, and even higher than  
161 Clinicaltrials.gov, is probably related to the application to WHO ICTR made by  
162 Clinicaltrials.gov in the US in 2017 and which is approved- local applications for  
163 registration when there is a WHO ICTR-accredited Level 1 registry where the trial is

164 conducted [13]. There is a significant drop in ChiCTR registrations in 2020, likely due  
165 to the impact of the COVID-19 and the large amount of medical resources invested in  
166 China, but this does not affect the future trend of steady growth in acupuncture  
167 clinical trial registrations. Currently, acupuncture trials are in a period of modest  
168 growth, with no peak growth performance. Therefore, emphasis should be placed on  
169 clinical innovation and talent development in acupuncture, and researchers need to  
170 broaden the disease spectrum of acupuncture to better promote the development of  
171 acupuncture.

## 172 **2. Reporting situation**

173 Concerning the reporting of trials, it is clear that the reporting rates of results from  
174 acupuncture trials registered at both centers are low, and ChiCTR has a significantly  
175 higher rate of reporting results than Clinicaltrials.gov does. This may be related to the  
176 Chengdu Declaration published in April 2006, which announced the implementation  
177 of priority publication by ChiCTR member journals on a case-by-case basis [14].  
178 There is no pattern in the number of trials published in terms of year due to a small  
179 number of publications. Based on the survey results, the low reporting rate is due to  
180 the following possibilities: some of trials were ended but not completed or not  
181 completed by the due date. Some of the trial manuscripts were rejected, which may  
182 due to low quality research or partial problems with the research program. Some of  
183 the trial manuscripts were accepted but not in print. Some of the trial results need to

184 be protected. Some projects have been delayed. Some of the trials' negative results  
185 were not submitted. In addition, it is possible that the low reporting rate is related to  
186 outcome reporting bias [15,16,17], and studies demonstrated that publication bias is a  
187 problem that still needs to be addressed [18].During the search process, some articles  
188 were found to be similar to the registered content but without the registration number  
189 to confirm. These articles rely on the responses of researchers to be sure, but most  
190 researchers did not respond to emails.

### 191 **3. Data availability**

192 The result of data availability in both centers is not satisfactory. According to our  
193 knowledge, some projects require that the results of the research be protected for a  
194 certain period of time. The data availability rate at Clinicaltrials.gov is significantly  
195 higher than that at ChiCTR, indicating that Clinicaltrials.gov is more concerned with  
196 the implementation of data disclosure. However, there is still much room for  
197 improvement in this area at both centers, far from the trial reporting rate. The centers  
198 need to play their roles as supervisors and ask trials that have published results to  
199 upload their data and take appropriate action if necessary. For trials with results that  
200 need to be protected, there is an option to first mark them on the registration website  
201 and make them public when the time comes.

### 202 **4. Study Status**

203 Clinicaltrials.gov clearly identifies trial study status and requires investigators to

204 record any changes about trial status in the relevant section of the website. The main  
205 status can be divided by a few groups are Completed, Not yet recruiting, Recruiting,  
206 Enrolling by invitation, Active, not recruiting, Suspended, Terminated, Withdrawn and  
207 Unknown. The trials with the status of Terminated and Withdrawn could be conducted  
208 to improve the limitations of study field. In addition, it was found that most of the  
209 trials with the status of Completed had not been queried for publication. Maybe, some  
210 of which had been accepted but not in print and some of which were in the process of  
211 being written and some results were asked to be protected. Therefore, the status  
212 should be marked clearly, and measures need to be taken by the registry to urge and  
213 facilitate trials with the status of Completed to report their results and make their data  
214 publicly available. This shows that the research status of trials is of critical  
215 importance.

## 216 **5. Proposed solutions**

217 We need to face the problem of low reporting rates of registered trial results. Firstly,  
218 in response to the lack of registration numbers, trial centers and major journals should  
219 call for clinical trials to be registered before publication and require registration  
220 numbers to be indicated. Secondly, researchers are expected to pay more attention to  
221 the results reporting and data disclosure of registered acupuncture clinical trials.  
222 Thirdly,  
223 to reduce the likelihood of rejection, researchers need to be considerate when

224 designing their studies and seek advice from experts. Then, registries will monitor the  
225 publication of results and timely updates in the registries. The registries shall, as far as  
226 possible, request investigators to update the progress of their trials, and shall take  
227 appropriate measures to promote the completion and reporting rate of trials that are  
228 not reported by the due date. At the same time, ChiCTR should be called upon to  
229 create a new research status item, and to set the number of years of research, and to  
230 urge investigators to update according to their research status. Funding institutions  
231 could also refer to the NIHR to request that registration information needs to be  
232 updated during the study period [19]. Furthermore, the potential for biased results  
233 reporting needs to be called out to journals and academics to pay more attention to the  
234 results of studies, rather than focusing on positive results. Researchers with negative  
235 results are encouraged to actively submit manuscripts. Last but not least, funding  
236 institutions should be strict in their project end approval, and could take a model from  
237 the NIHR [16] in requiring that the date of publication of trial results be disclosed and  
238 that past registrations and publications be taken into account when reviewing funding  
239 applications for new clinical trials.

## 240 **6. Limitations**

241 Limitations of this study: This paper mainly focuses on the acupuncture trials  
242 registered with Clinicaltrials.gov and ChiCTR, which may not reflect registrations and  
243 reporting from other registries, regions or countries. International studies may be

244 carried out with global cooperation. Relevant information regarding WHO is not  
245 available which set a limit to data. The study is based on trials registered from 1  
246 January 2013 to 31 December 2021. Not all leaders responded to the survey, which  
247 may cause bias in the results. The questionnaire was conceived with a small number  
248 of participants and should be followed up with a larger survey. Subject classification  
249 is not shown on the Clinicaltrials.gov website, hence, it is not possible to analyze the  
250 relationship between registration, reporting and subject classification.

## 251 **Conclusion**

252 The number of acupuncture clinical trial registries is increasing steadily, but the  
253 reporting rate of trial results is very low and the transparency of data is not ideal. At  
254 the same time, the unavailability of registered trial results greatly weakens the  
255 advantages of clinical trial registries, causing a waste of research resources and funds  
256 and a possible shortage of research in the corresponding fields. Therefore, firstly, it is  
257 recommended that researchers need to put more focus on acupuncture clinical trial  
258 reports with respect and be considerate when designing their studies and seek advice  
259 from experts. Secondly, study progress can be recorded and monitored on the  
260 registration platforms which allow the public to access data. At the same time, the  
261 journal could update the evaluation criteria for evaluating negative-result reports to  
262 minimize the bias that may occur. Researchers with negative results are encouraged to  
263 actively submit manuscripts. Last but not least, funding institutions are expected to



264 optimize the end-of-trial review, strengthen the reporting monitoring of core outcome  
265 indicators, regulate clinical research and reduce the waste of public resources.

## 266 **Data Availability**

267 The data used to support the findings of this study are included in article. The original  
268 datasets presented in this study are available from the corresponding author on reasonable  
269 request.

## 270 **Acknowledgments**

This work was supported by the Zhejiang Provincial Administration of Traditional  
Chinese Medicine (grant no. 2020ZQ026) <https://wsjkw.zj.gov.cn/> , and the State  
Administration of Traditional Chinese Medicine of the People's Republic of China  
( grant no. zyycx201901 ) <http://www.satcm.gov.cn/> .

## 271 **Author Contributions**

272 Conceived and designed the experiments: QAZ and HJL conceived the ideas and  
273 drafted the manuscript. YF, YYC and BLC contributed to the acquisition and the  
274 analysis of data. QWZ revised the manuscript. All authors approved the final version  
275 of the manuscript accepted for publication.

## 276 **References**

277 [1] International Committee of Medical Journal Editors. Clinical trials registration [Internet]. *ICMJE*.  
278 2020 [cited 21 May 2020]. Available from:  
279 <http://www.icmje.org/about-icmje/faqs/clinical-trials-registration/>.

- 280 [2] De Angelis CD, Drazen JM, Frizelle FA, Haug C, Hoey J, Horton R, et al. Is this clinical trial fully  
281 registered? A statement from the International Committee of Medical Journal Editors. *JAMA*.  
282 2005;293(23):2927–9. doi: 10.1056/NEJMe058127 PMID: 15911780.
- 283 [3] Laine C, Horton R, DeAngelis CD, Drazen JM, Frizelle FA, et al. Clinical trial registration[J]. *BMJ*.  
284 2007 Jun 9;334(7605):1177-8. doi: 10.1136/bmj.39233.510810.80 PMID: 17548363.
- 285 [4] Song F, Parekh S, Hooper L, Loke YK, Ryder J, Sutton AJ, et al. Dissemination and publication of  
286 research findings: an updated review of related biases. *Health Technol Assess*. 2010 Feb;14(8):iii, ix-xi,  
287 1-193. doi: 10.3310/hta14080 PMID: 20181324.
- 288 [5] Boutron I, Ravaud P. Misrepresentation and distortion of research in biomedical literature. *Proc*  
289 *Natl Acad Sci U S A*. 2018 Mar 13;115(11):2613-2619. doi: 10.1073/pnas.1710755115 PMID:  
290 29531025.
- 291 [6] Laine C, Horton R, DeAngelis CD, Drazen JM, Frizelle FA, Godlee F, et al. Clinical trial  
292 registration--looking back and moving ahead. *N Engl J Med*. 2007 Jun 28;356(26):2734-6. doi:  
293 10.1056/NEJMe078110 PMID: 17548427.
- 294 [7] 42 CFR 11. Clinical trials registration and results information submission; *Final rule*. Federal  
295 Register.
- 296 [8] Viergever RF, Li K. Trends in global clinical trial registration: an analysis of numbers of registered  
297 clinical trials in different parts of the world from 2004 to 2013. *BMJ Open*. 2015 Sep 25;5(9):e008932.  
298 doi: 10.1136/bmjopen-2015-008932 PMID: 26408831.
- 299 [9]Ying Xu, Bo Chen, Yi Guo. Analysis and discussion on the current state of acupuncture clinical

- 300 research registration[J]. *Chinese Acupuncture*. 2015,35(06):605-607. China.
- 301 [10]Jia Yan, Jian Pei. Application of clinical trial registration in acupuncture clinics[J]. *Chinese Journal*  
302 *of Acupuncture and Moxibustion (Electronic Edition)*. 2014,3(01):8-12. China.
- 303 [11]Chinese Clinical Trial Registry. [Internet]. ChiCTR. 2022 [cited 20 April 2022]. Available from:  
304 <http://www.chictr.org.cn/index.aspx>.
- 305 [12]Clinicaltrials.gov. [Internet]. 2022 [cited 20 April 2022]. Available from:  
306 <http://www.clinicaltrials.gov/>.
- 307 [13]Taixiang Wu, Minawal Abdu, Yuan Hao, Xiangyu Kong, Shuo Chen, Youping Li. 10 years of  
308 clinical trial registration in China: current states and issues[J]. *Chinese Journal of Evidence-Based*  
309 *Medicine*. 2018,18(06): 522-525. China.
- 310 [14] Joint Declaration Working Group, Youping Li, Taixiang Wu, Jing Li, Zihong Zhong,  
311 Wannian Jia. A joint declaration on the creation of a clinical trial registration and publication  
312 mechanism in China[J]. *Journal of Nanjing Medical University (Social Science Edition)*.  
313 2006(03): 265-266. China.
- 314 [15] Chan A, Hróbjartsson A, Haahr MT, Gøtzsche PC, Altman DG. Empirical evidence for selective  
315 reporting of outcomes in randomized trials: comparison of protocols to published articles. *JAMA*. 2004  
316 May 26;291(20):2457-65. doi: 10.1001/jama.291.20.2457 PMID: 15161896.
- 317 [16] Dwan K, Altman DG, Arnaiz JA, Bloom J, Chan A, Cronin E, et al. Systematic review of the  
318 empirical evidence of study publication bias and outcome reporting bias. *PLoS One*. 2008 Aug  
319 28;3(8):e3081. doi: 10.1371/journal.pone.0003081 PMID: 18769481.

320 [17] Dwan K, Gamble C, Williamson PR, Kirkham JJ; Reporting Bias Group. Systematic review of the  
321 empirical evidence of study publication bias and outcome reporting bias - an updated review. *PLoS One*.  
322 2013 Jul 5;8(7):e66844. doi: 10.1371/journal.pone.0066844 PMID: 23861749.

323 [18] Edem B, Onwuchekwa C, Wariri O, Nkereuwem E, Nkereuwem OO, Williams V. Trends in  
324 clinical trial registration in sub-Saharan Africa between 2010 and 2020: a cross-sectional review of  
325 three clinical trial registries. *Trials*. 2021 Jul 21;22(1):472. doi: 10.1186/s13063-021-05423-1 PMID:  
326 34289892.

327 [19]National Institute for Health Research. NIHR policy on clinical trial registration and disclosure of  
328 results [Internet]. NIHR. 2022 [cited 20 April 2022]. Available from:  
329 <https://www.nihr.ac.uk/documents/nihr-policy-on-clinical-trial-registration-and-disclosure-of-results/12>  
330 252.
